# Supplementary material
Source: PubMed Central journal article supplement (PMC4195590)
Supplement: NIHMS623985-supplement-voting_results.pdf [file NIHMS623985-supplement-voting_results.pdf]

# Voting Results for the 2009 NTP Satellite Symposium

- Voting choices are listed for each case
- The presenter's choice is outlined with a green box
- The bar graphs show voting results with percentages
- The numbers below the bar graph correspond with the voting choices

# Hill Case 1

## What's Your Diagnosis?

1. Adrenal medullary hyperplasia
2. Pheochromocytoma, benign
3. Pheochromocytoma, malignant
4. Pheochromocytoma, complex
5. Ganglioneuroma

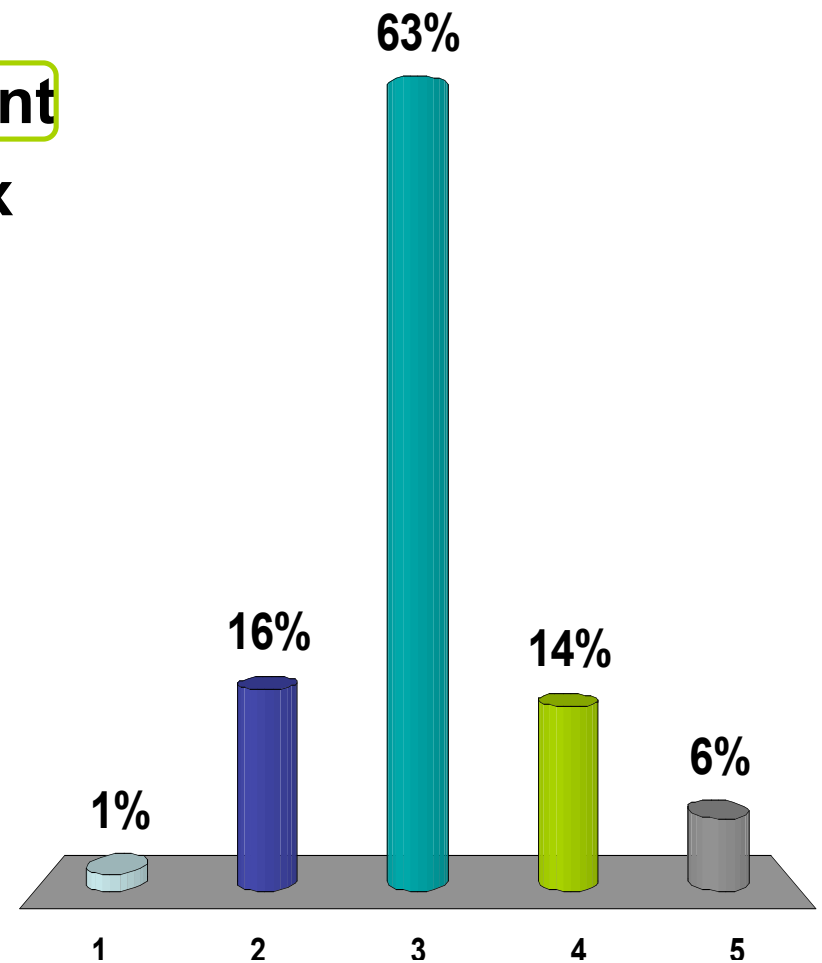

# Hill Case 2

## What's Your Diagnosis?

1. Adrenal medullary hyperplasia
2. Pheochromocytoma, benign
3. Pheochromocytoma, malignant
4. Neuroblastoma
5. Hemangiosarcoma

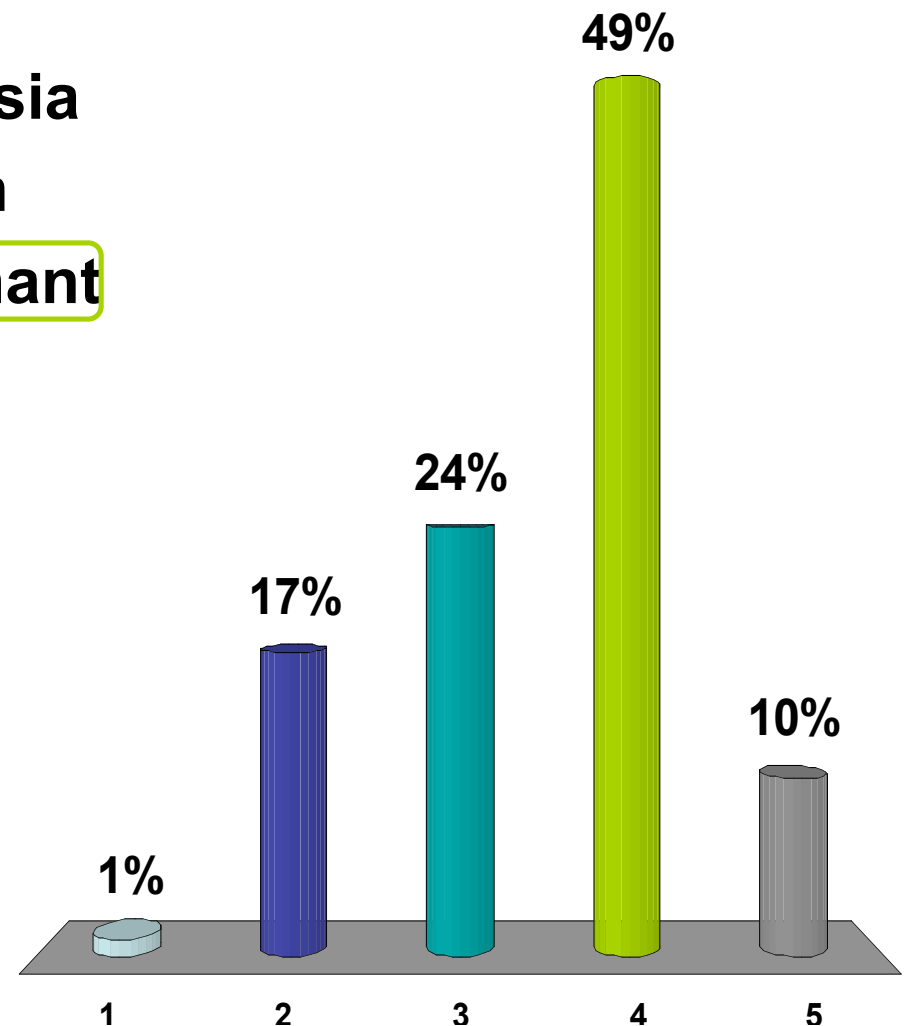

# Hill Case 3

## What's Your Diagnosis?

1. **Adrenal medullary hyperplasia**
2. **Pheochromocytoma, benign**
3. **Pheochromocytoma, malignant**
4. **Angiectasis**
5. **Hemangiosarcoma**

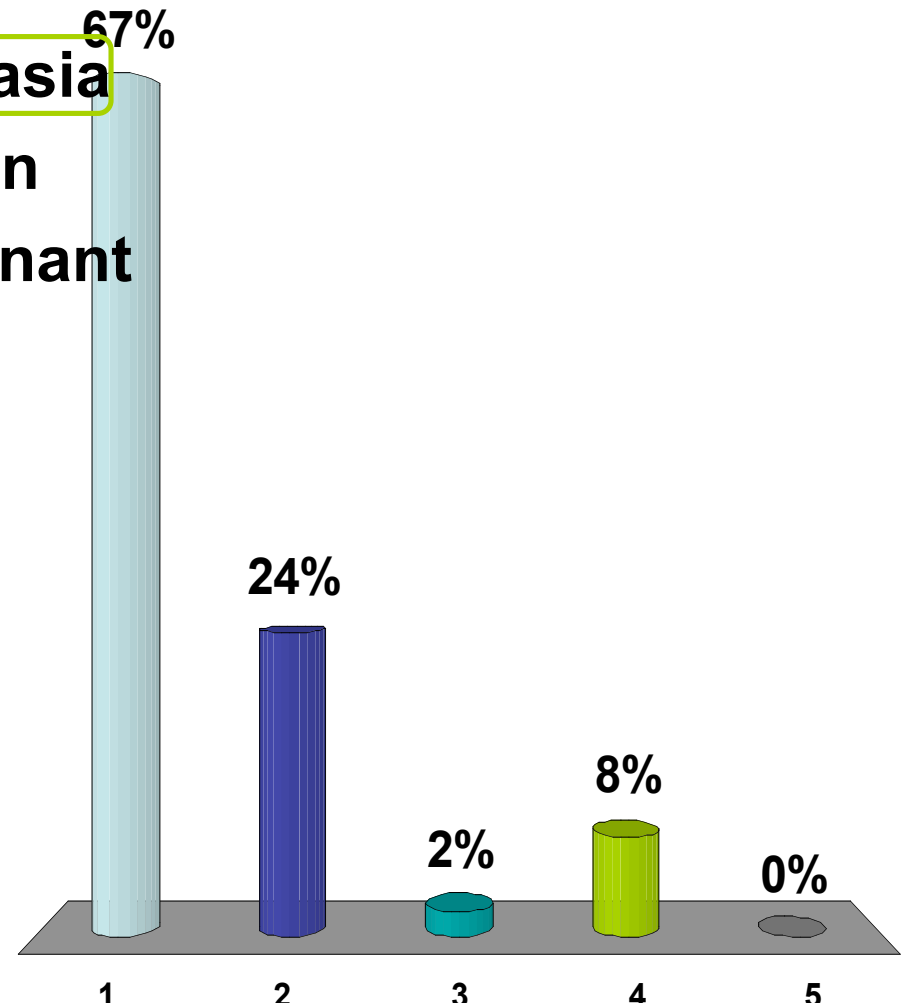

# Miller Case 1

## What's Your Diagnosis?

1. Epithelioid hemangioendothelioma
2. Mesothelioma
3. Hepatocholangiocarcinoma
4. Hepatocellular carcinoma
5. Atriacaval mesothelioma
6. Hepatoblastoma

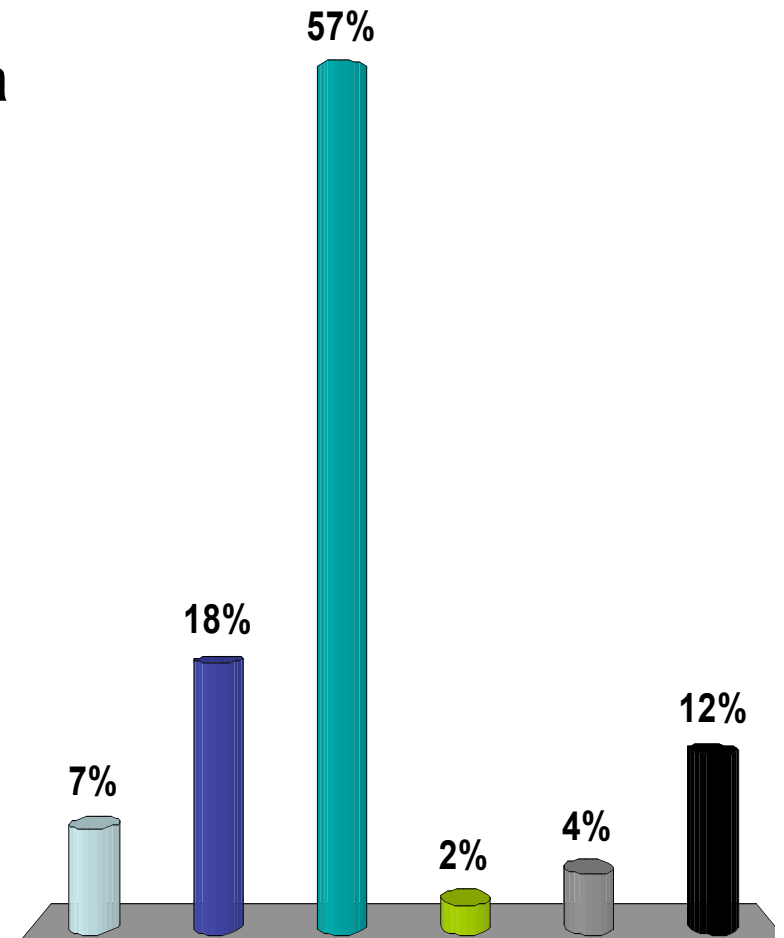

# Malarkey Case 1

## What's Your Diagnosis?

1. Meningioma (meningothelial)
2. Meningioma (transitional)
3. Meningioma, NOS
4. Malignant glioma
5. Histiocytic sarcoma
6. Inflammation
7. Other

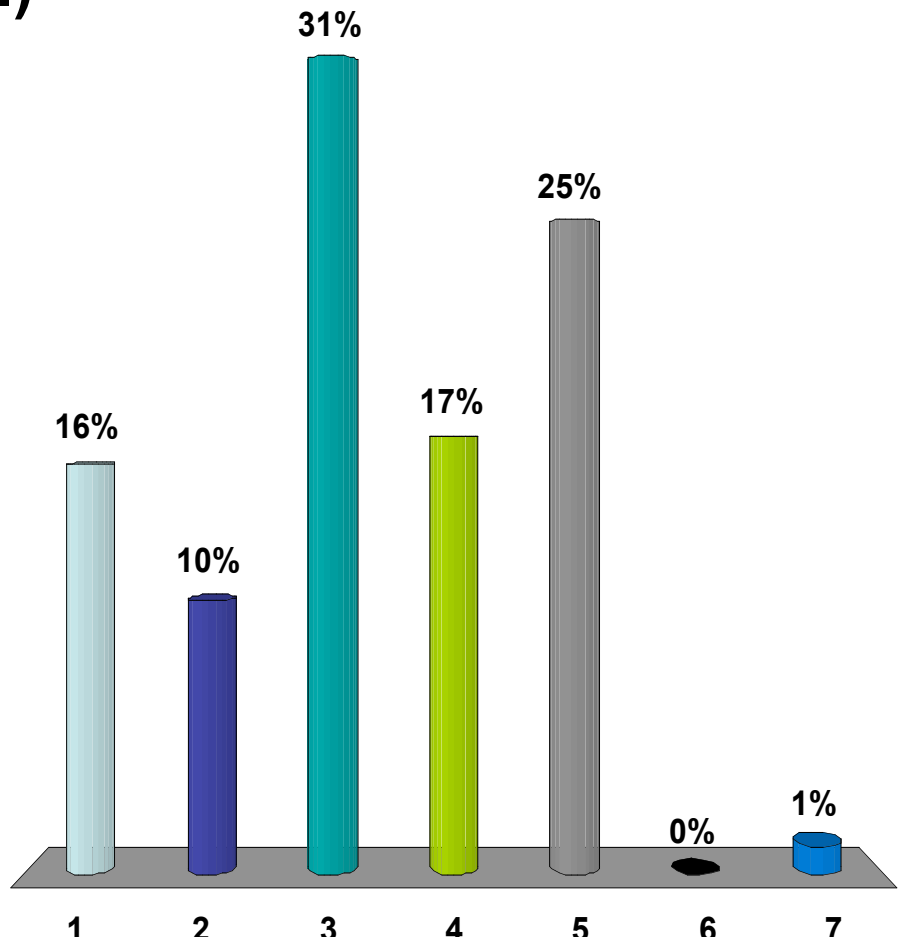

# Malarkey Case 2

## What's Your Diagnosis?

1. Adenocarcinoma of prostate
2. Urethral transitional cell carcinoma
3. Urethral gland carcinoma
4. Squamous cell carcinoma
5. Carcinoma, NOS
6. Other

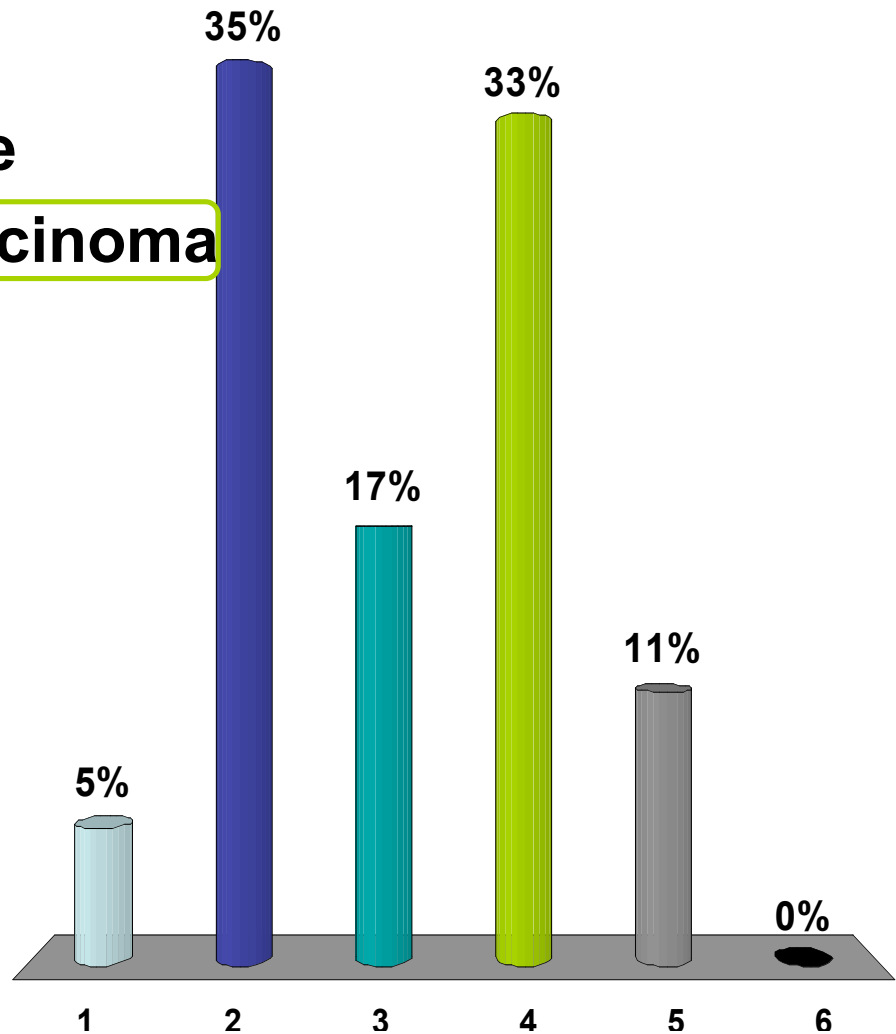

# Malarkey Case 3

## What's Your Diagnosis?

1. Carcinosarcoma
2. Sarcoma, NOS
3. Thymoma
4. Rhabdomyosarcoma
5. Sarcomatoid carcinoma
6. Other

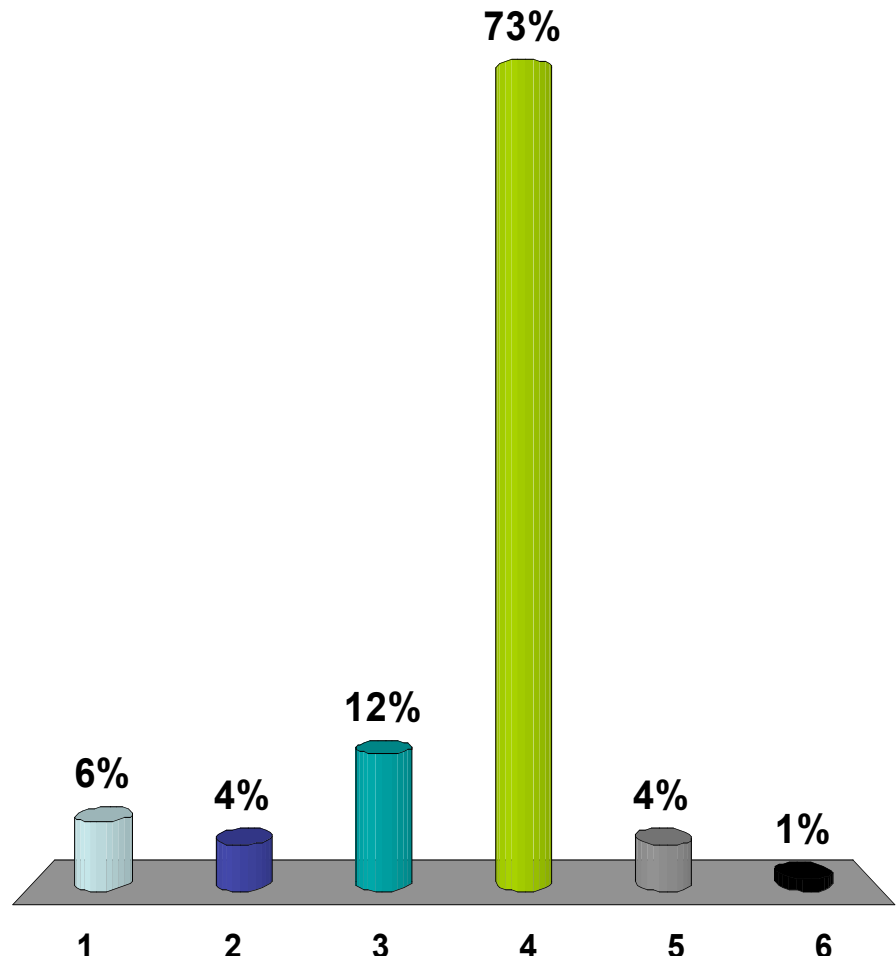



# Suttie/Latimer Case 1

## What's Your Diagnosis?

1. Basal cell tumor
2. Keratoacanthoma
3. Trichoepithelioma
4. Squamous cell papilloma
5. Squamous cell carcinoma

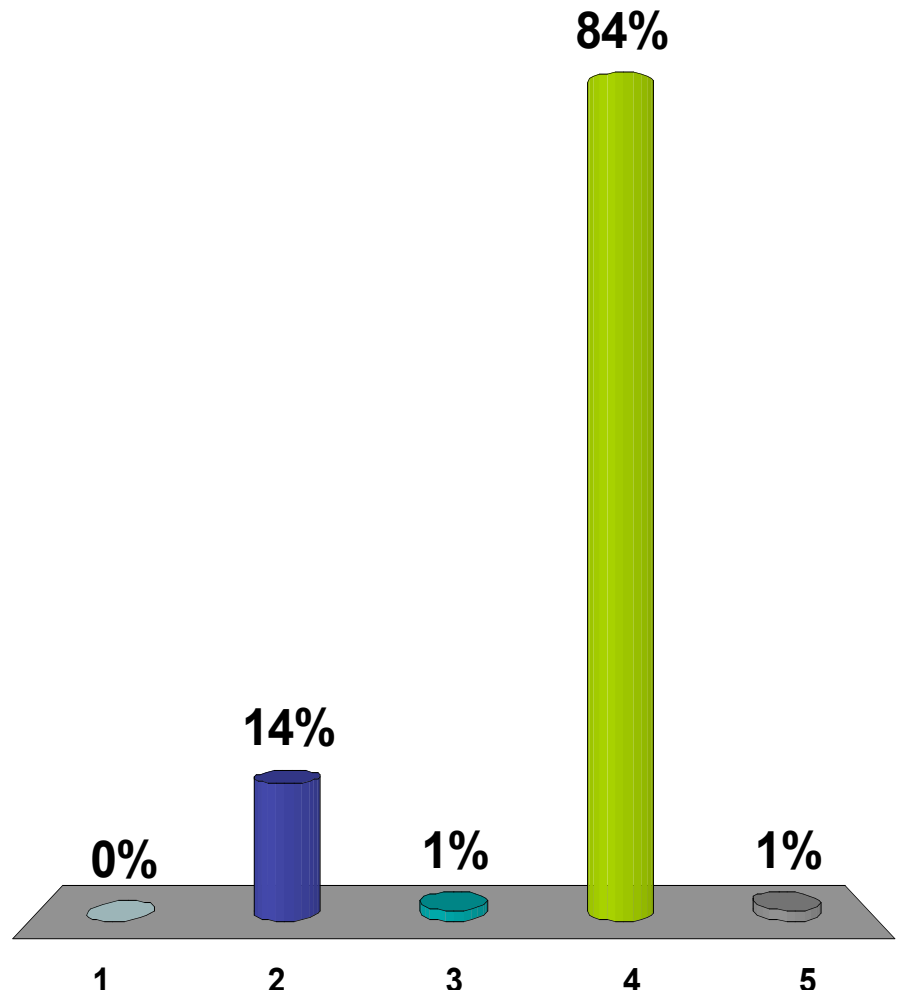

# Suttie/Latimer Case 2

## What's YOUR Threshold for Neoplasia?

1. One
2. Two
3. Three
4. Four
5. Five
6. Six

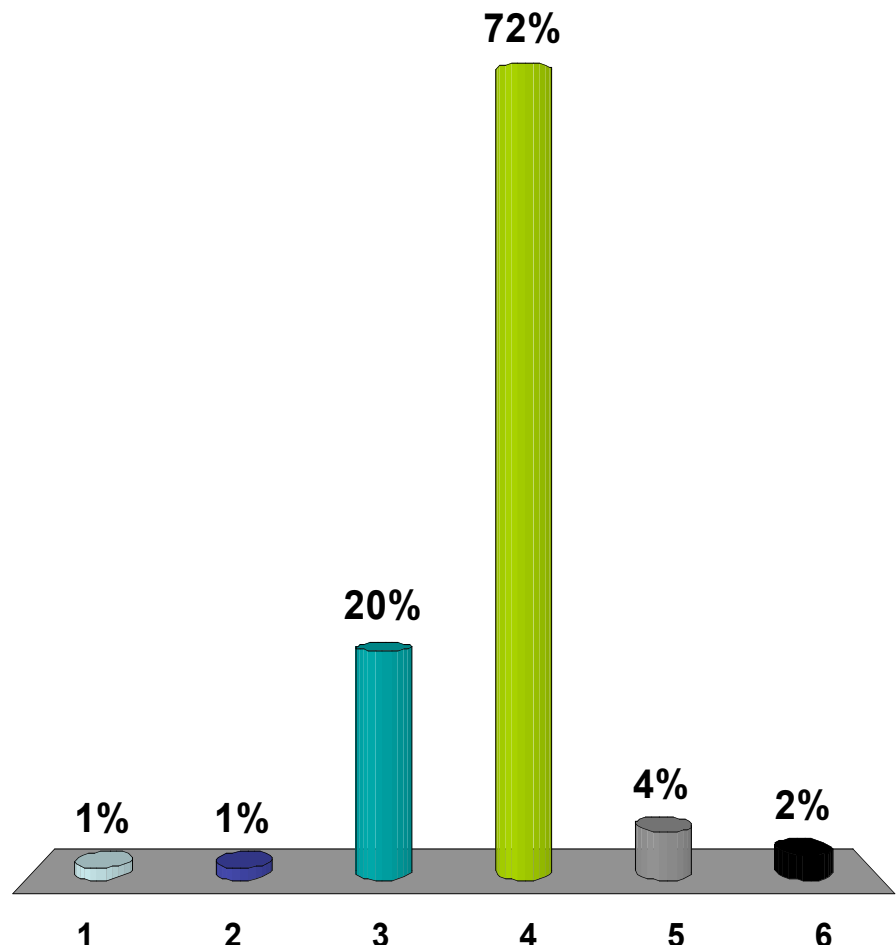

# Suttie/Latimer Case 3

## What's Your Diagnosis?

1. Osteosarcoma
2. Ameloblastoma
3. **Odontoma**
4. Injury/Inflammation
5. Chondrosarcoma

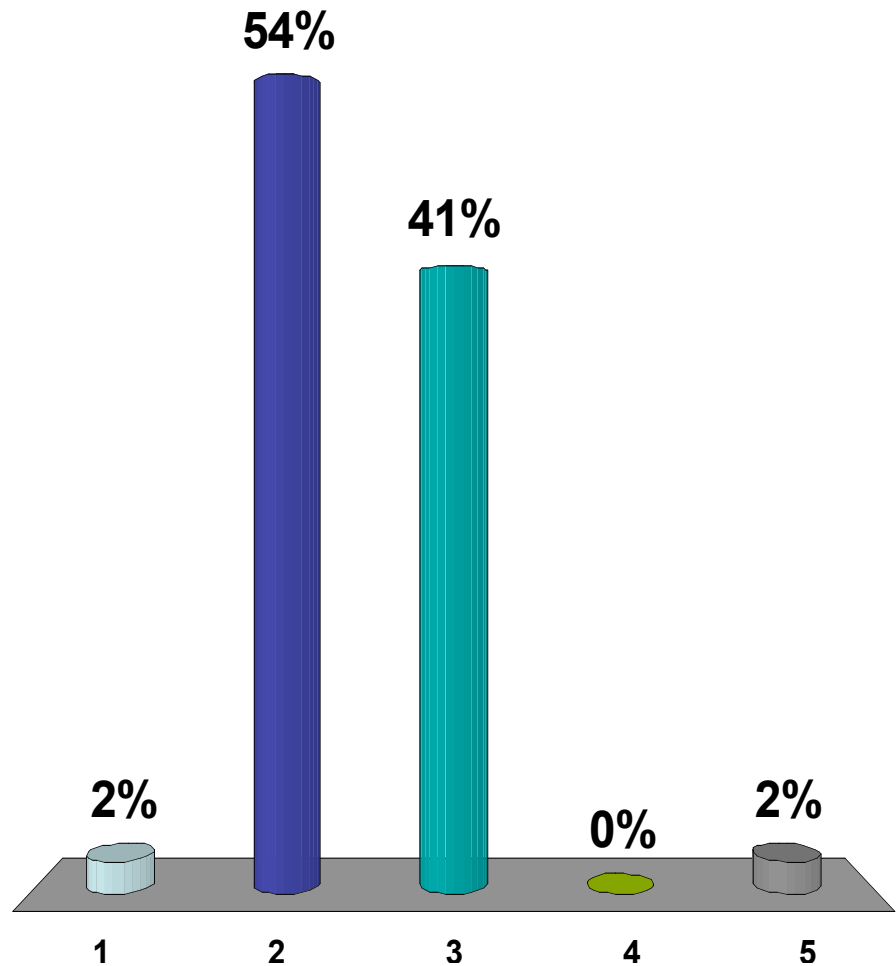

# Suttie/Latimer Case 4

## What's Your Diagnosis?

1. Osteosarcoma
2. Ameloblastoma
3. Odontoma
4. Injury/Inflammation
5. Fibrosarcoma

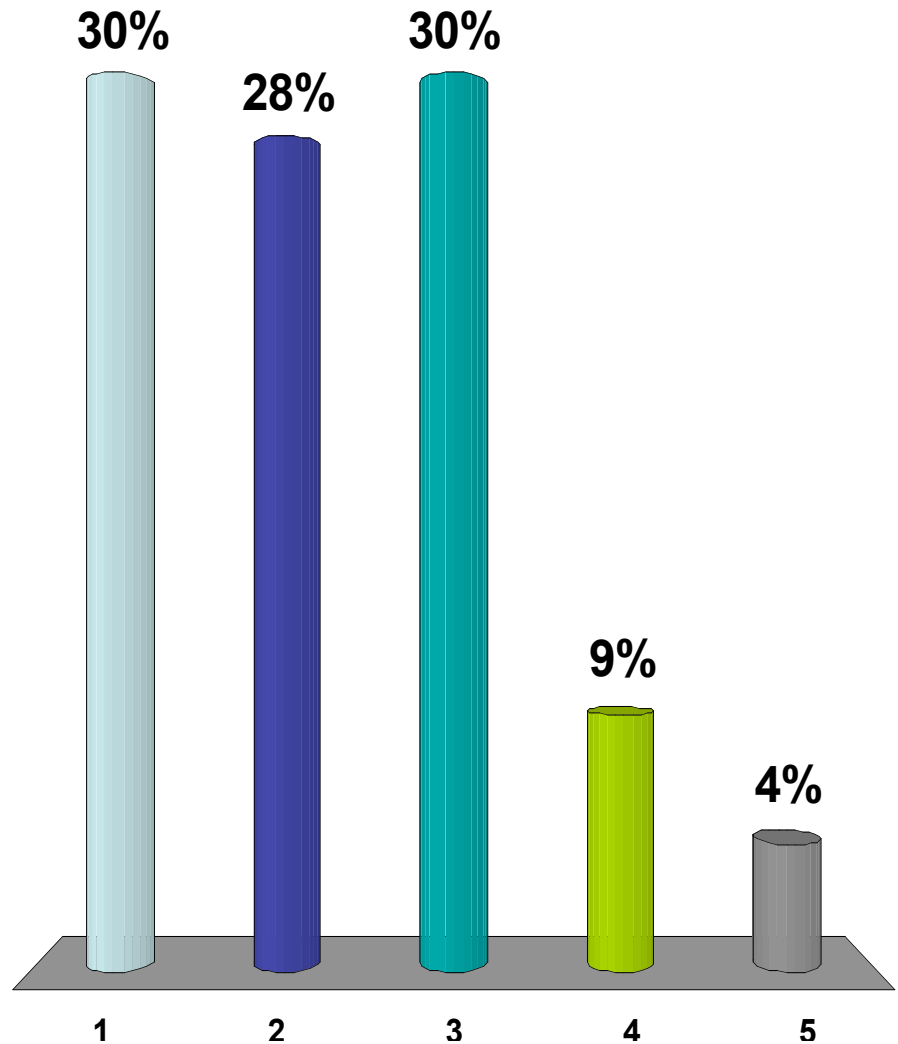

# Suttie/Latimer Case 5

## What's Your Diagnosis?

1. Lymphoma
2. Myeloproliferative syndrome
3. Extramedullary hematopoiesis
4. Erythroleukemia
5. Myeloid leukemia

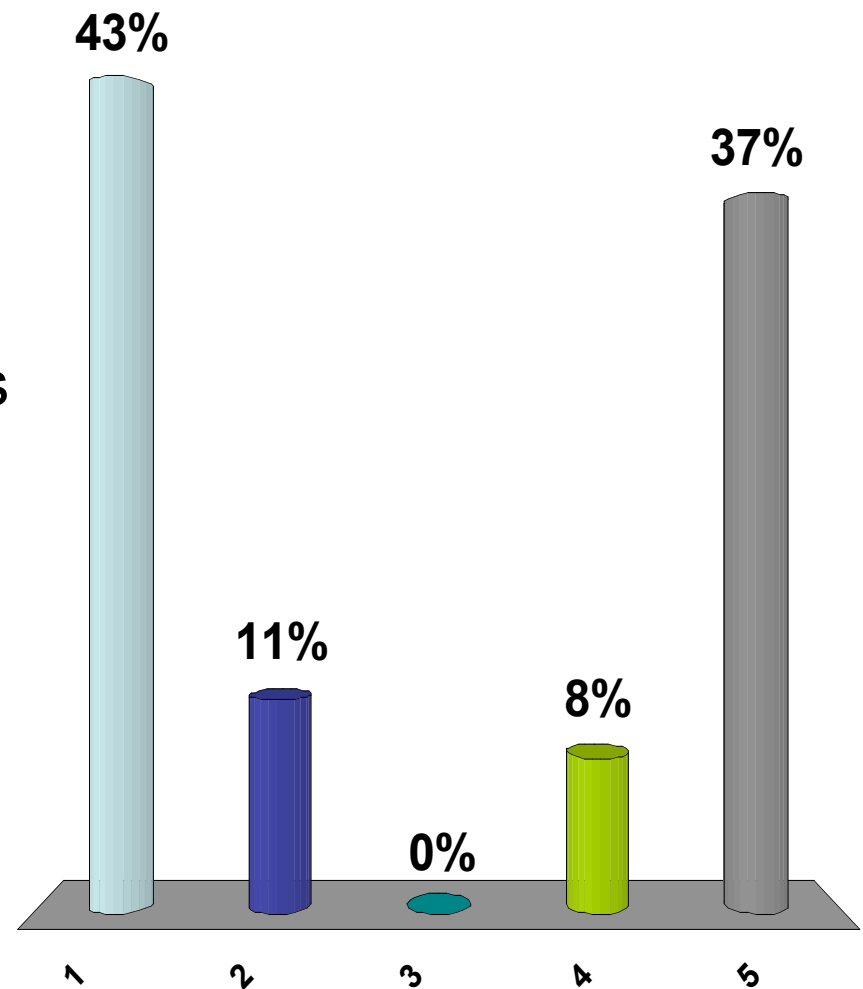

# Suttie/Latimer Case 6

## What's Your Diagnosis?

1. Erythroleukemia
2. Lymphoma
3. Myeloproliferative syndrome
4. Extramedullary hematopoiesis
5. Myeloid leukemia

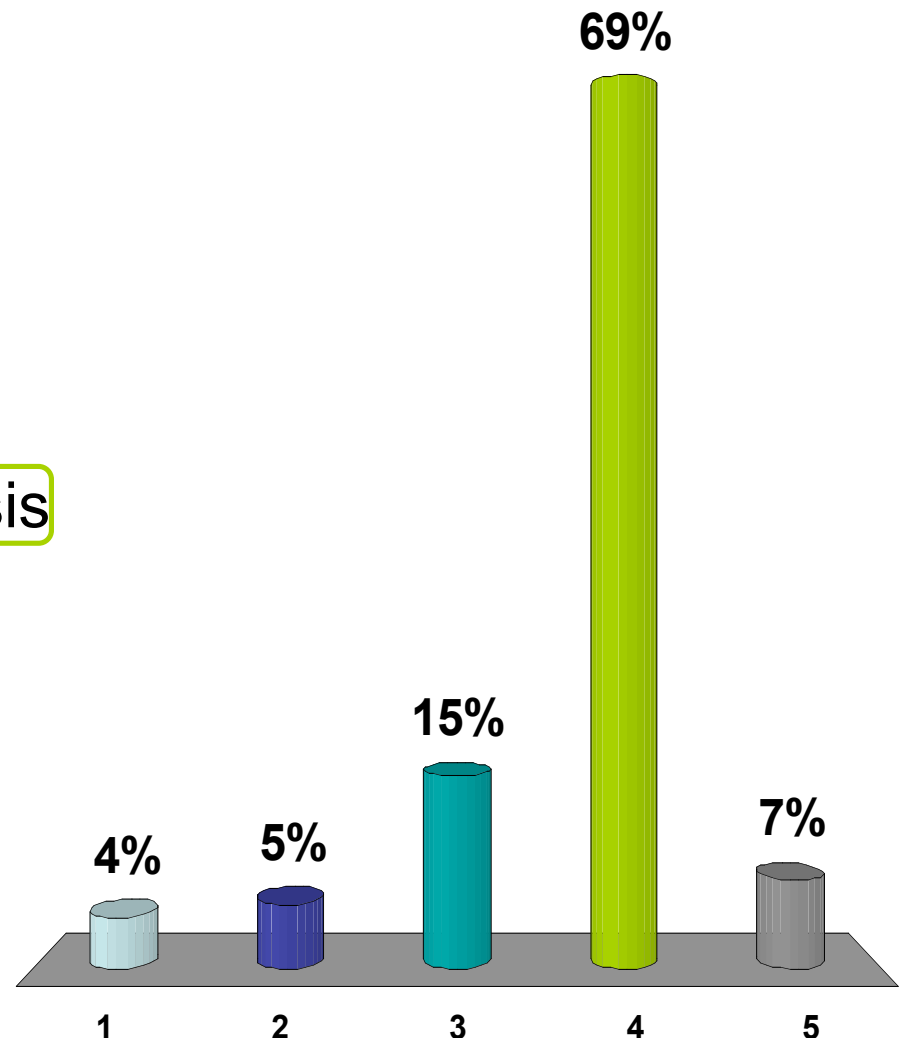

## Suttie/Latimer Case 7

What's YOUR Threshold for Neoplasia vs. EMH?

1. One
2. Two
3. Three
4. Four
5. Five
6. Six

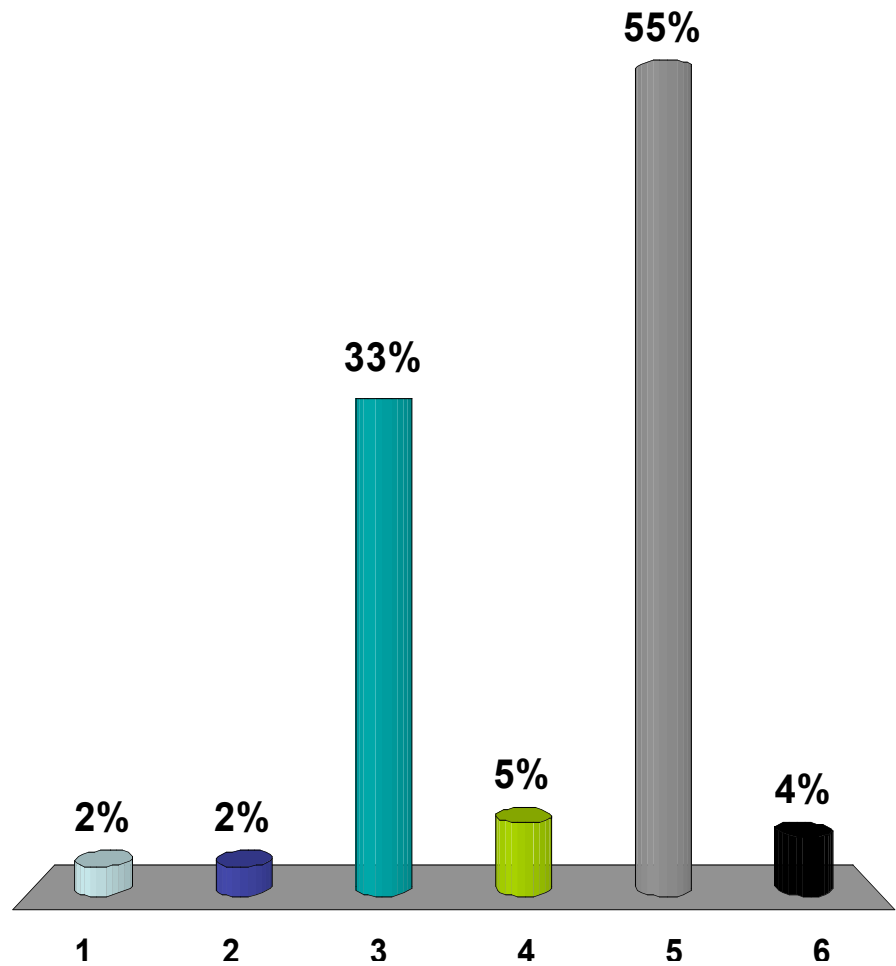

# Travlos Case 1

## What's Your Diagnosis?

1. Normal
2. Granulocytic leukemia
3. Leukemoid response
4. Hematopoietic cell proliferation
5. Myeloid hyperplasia
6. Need more information

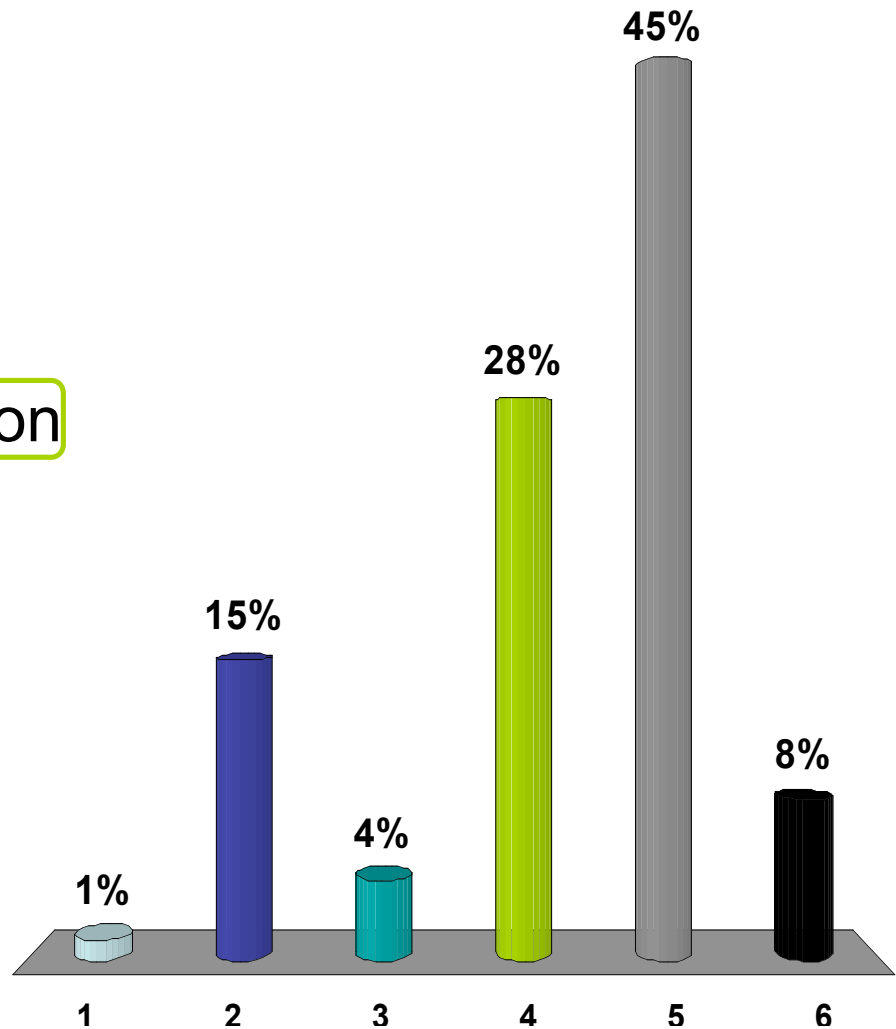



# Kaufman Case 1

## What's Your Diagnosis?

1. Gliosis
2. Astrocytoma, benign
3. Astrocytoma, malignant
4. Oligodendroglioma, benign
5. Oligodendroglioma, malignant
6. Glioma, mixed, benign
7. Glioma, mixed, malignant
8. Others

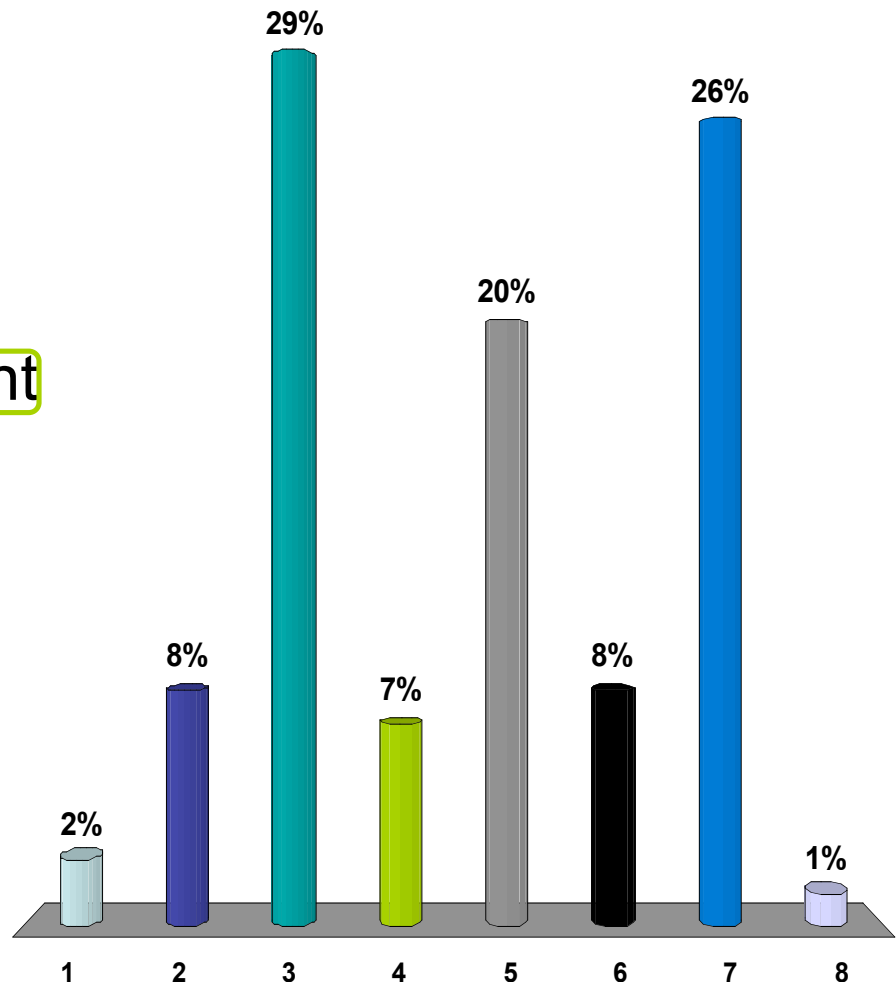

# Kaufman Case 2

## What's Your Diagnosis?

1. Gliosis
2. Astrocytoma, benign
3. Astrocytoma, malignant
4. Oligodendroglioma, benign
5. Oligodendroglioma, malignant
6. Glioma, mixed, benign
7. Glioma, mixed, malignant
8. Others

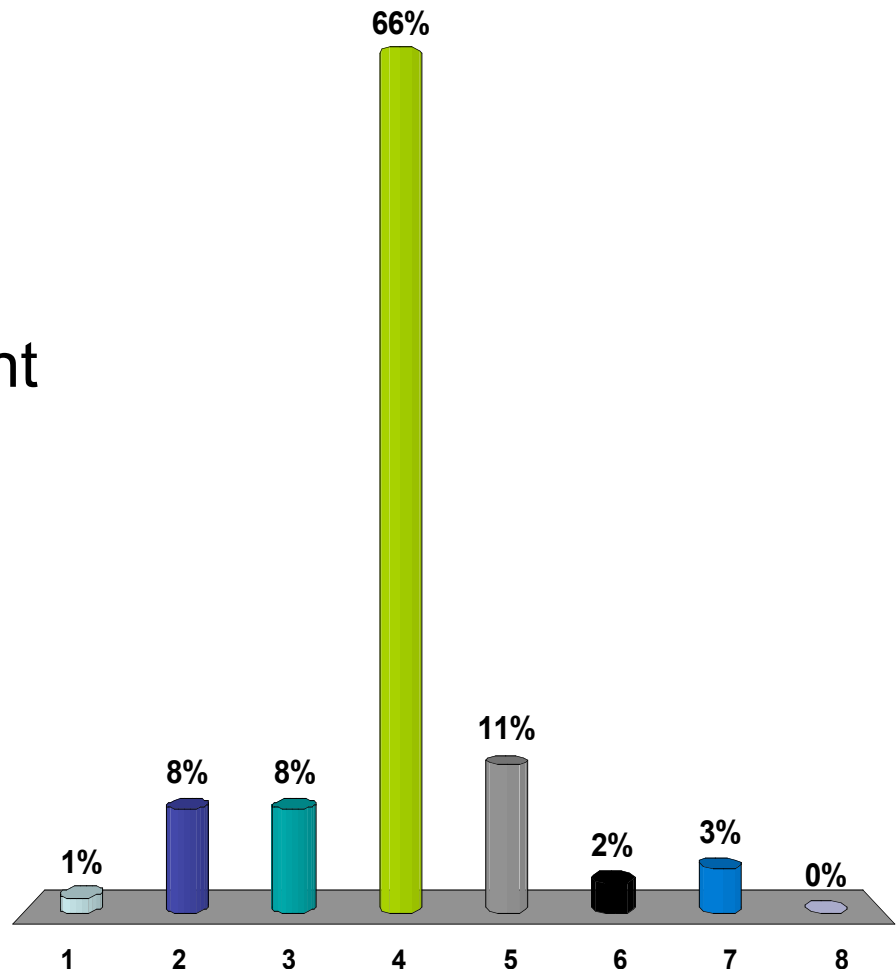

# Kaufman Case 3

## What's Your Diagnosis?

1. Gliosis
2. Astrocytoma, benign
3. **Astrocytoma, malignant**
4. Oligodendroglioma, benign
5. Oligodendroglioma, malignant
6. Glioma, mixed, benign
7. Glioma, mixed, malignant
8. Others

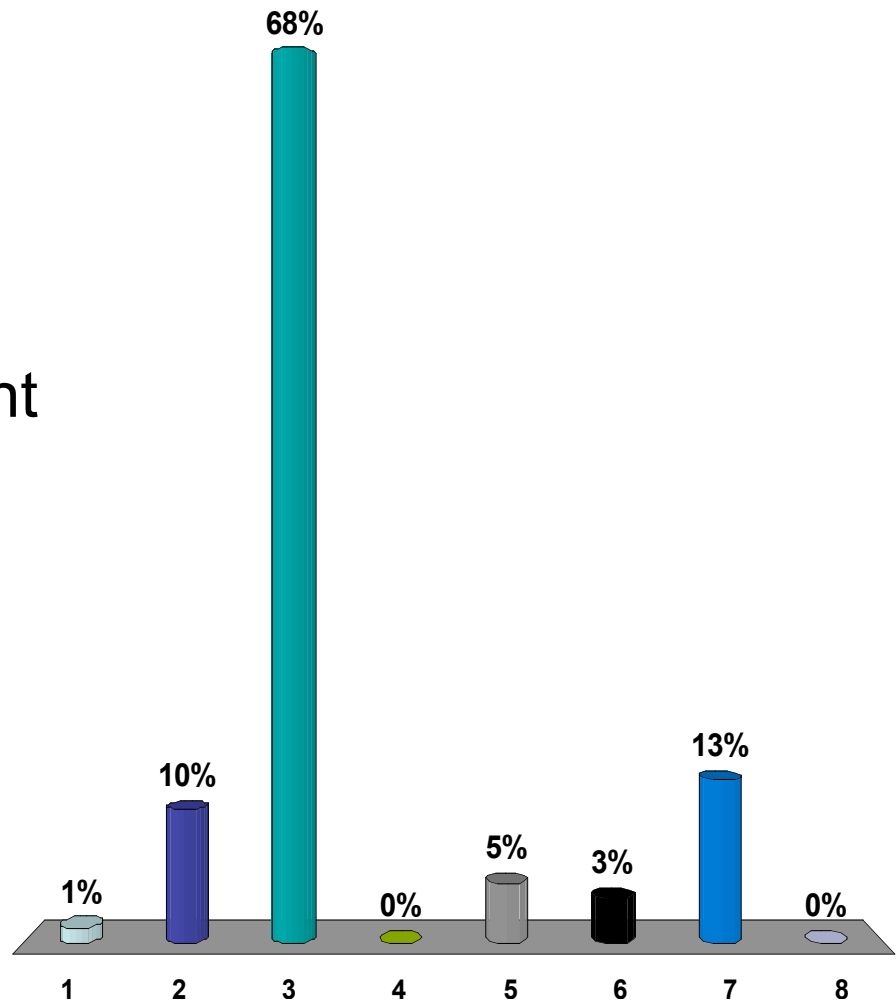

# Kaufman Case 4

## What's Your Diagnosis?

1. Gliosis
2. Astrocytoma, benign
3. Astrocytoma, malignant
4. Oligodendroglioma, benign
5. Oligodendroglioma, malignant
6. Glioma, mixed, benign
7. Glioma, mixed, malignant
8. Others

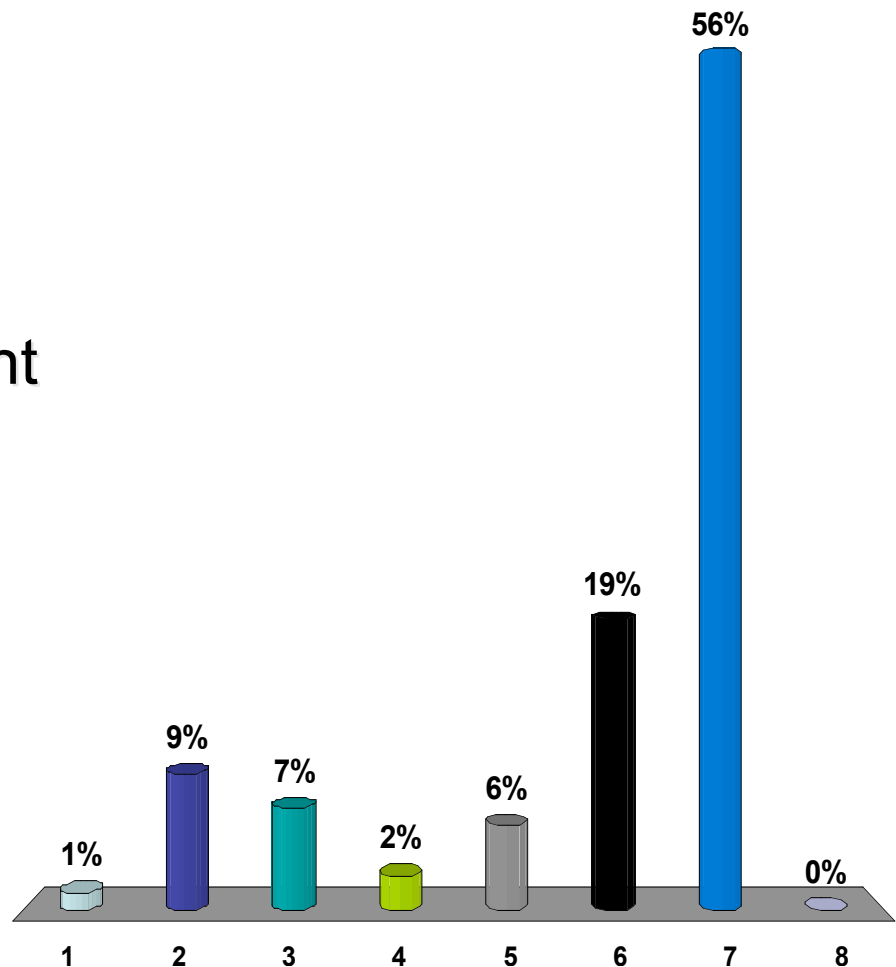

# Kaufman Case 5

## What's Your Diagnosis?

1. Gliosis
2. Astrocytoma, benign
3. Astrocytoma, malignant
4. Oligodendroglioma, benign
5. Oligodendroglioma, malignant
6. Glioma, mixed, benign
7. Glioma, mixed, malignant
8. Others

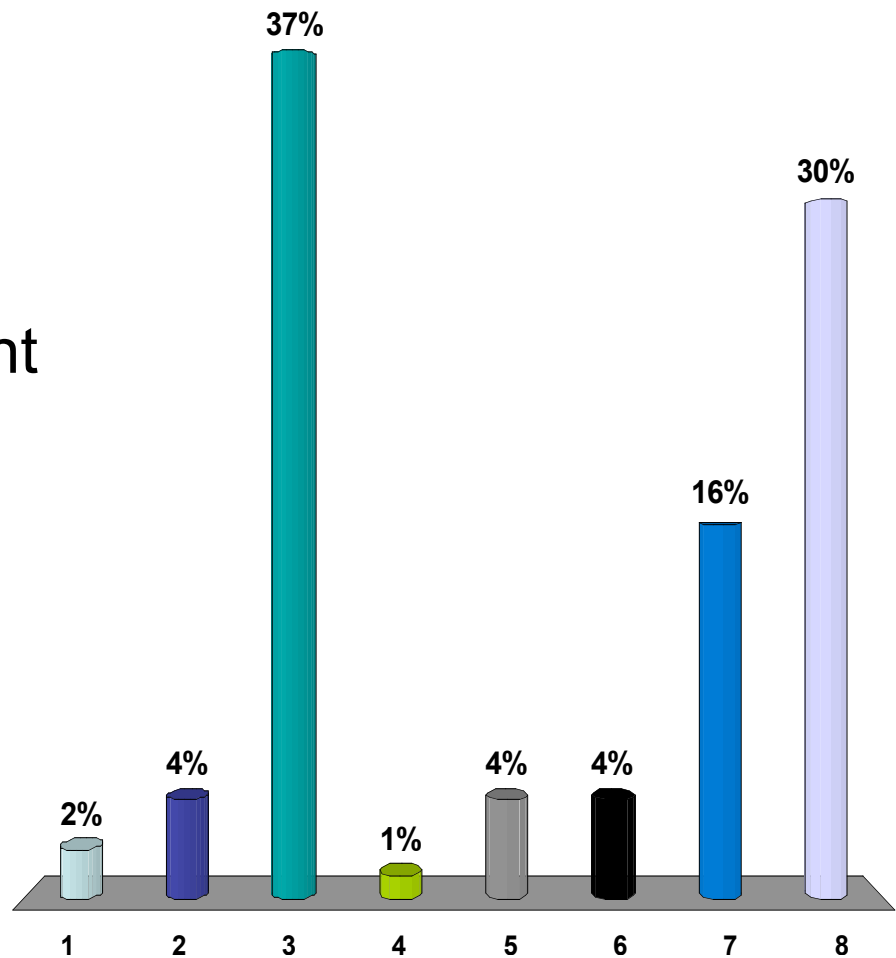

# Hailey Case 1

## What's Your Diagnosis?

1. Hemangiosarcoma
2. Hemangioma
3. Undifferentiated spindle cell tumor
4. Alveolar bronchiolar carcinoma
5. Metastatic neoplasm (origin not evident)
6. Other

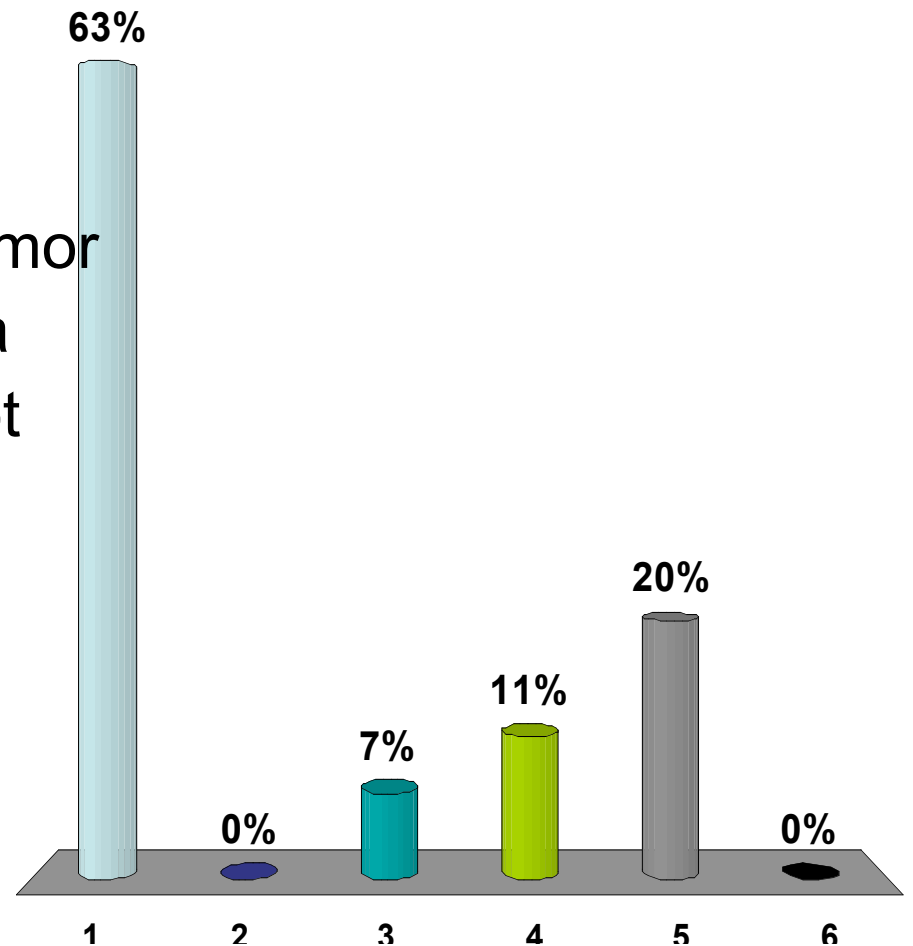

# Hailey Case 2

## What's Your Diagnosis?

1. Hemangioma
2. Hemangiosarcoma
3. Endothelial hyperplasia
4. Angiomatous hyperplasia
5. Angiomatous hyperplasia/fibrosis
6. Spindle cell hyperplasia/fibrosis
7. Other

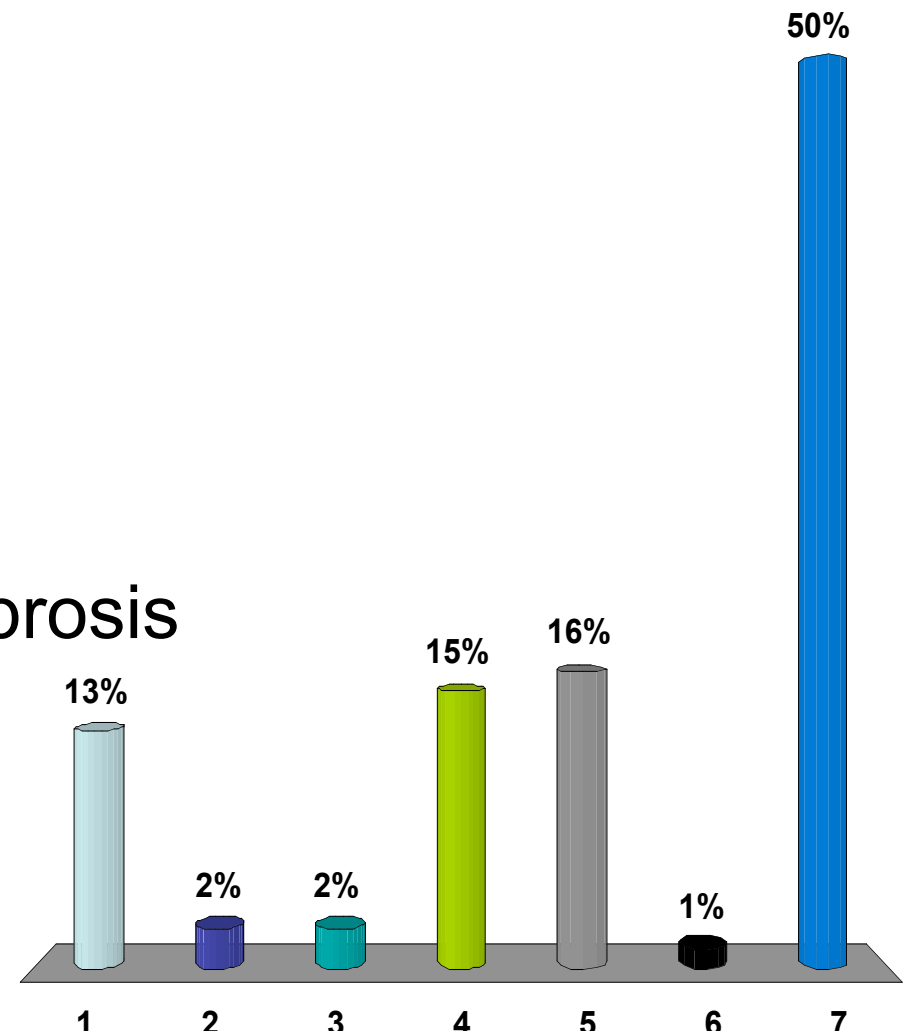

# Morrison Case 1

## What's Your Diagnosis?

1. Fibrous malignant meningioma
2. Meningothelial malignant meningioma
3. Myxoid malignant meningioma
4. Anaplastic malignant meningioma
5. Another diagnosis?

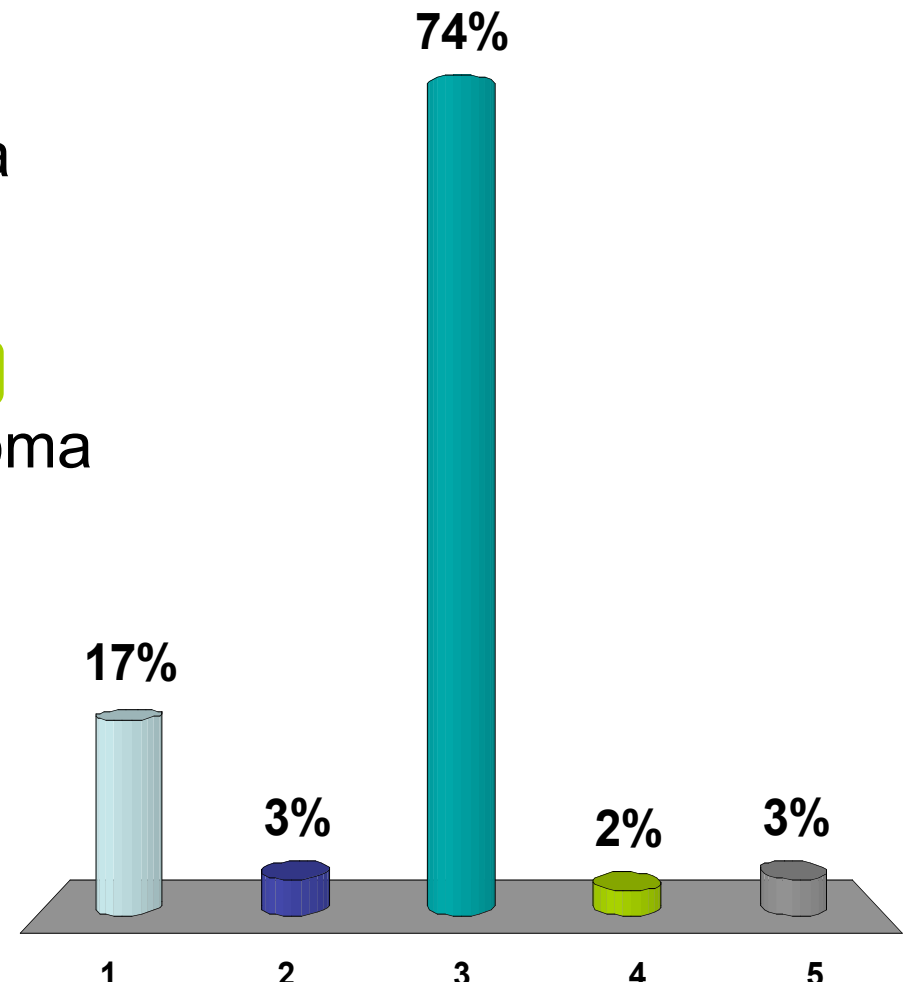



# Morrison Case 2

## What's Your Diagnosis?

1. Meningothelial meningioma
2. Psammomatous meningioma
3. Fibrous meningioma
4. Another diagnosis?

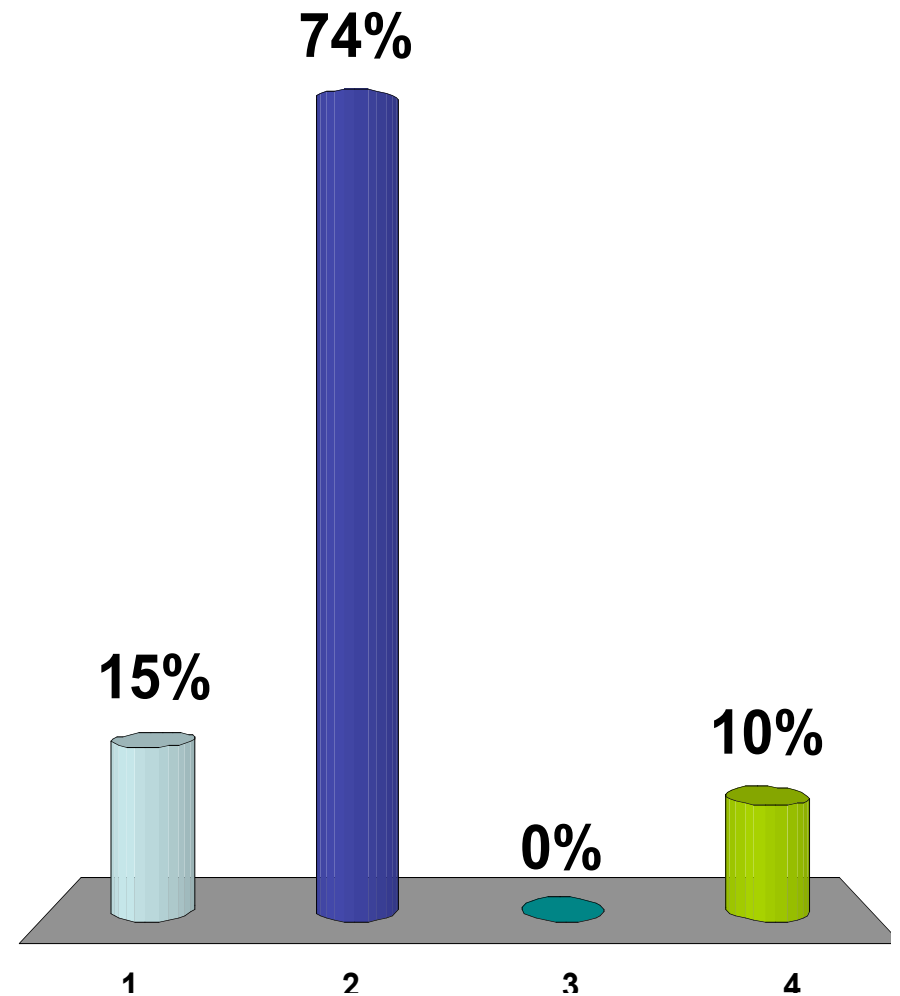

# Nolte Case 1

## What's Your Diagnosis?

1. No abnormality (tangential section of limiting ridge)
2. **Hyperplasia, squamous cell**
3. Acanthosis
4. Hyperplasia, basal cell
5. Papilloma, squamous cell

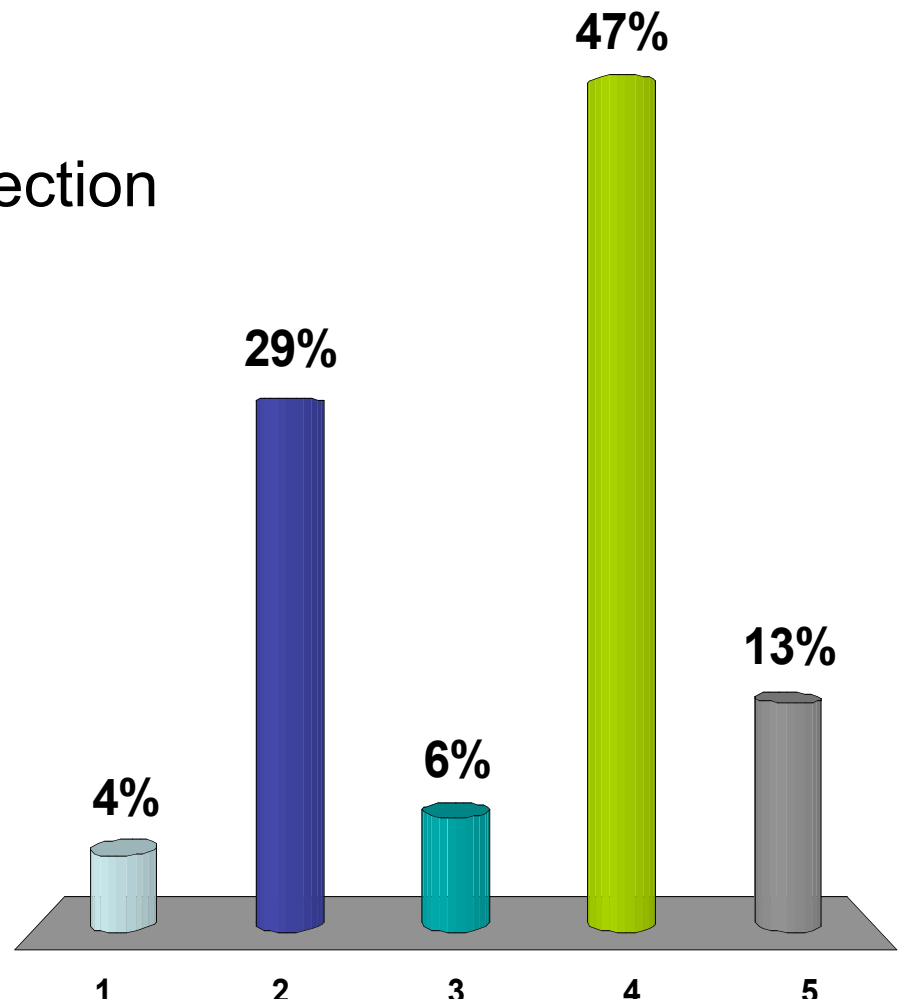

# Nolte Case 2

## What's Your Diagnosis?

1. No abnormality (tangential section of limiting ridge)
2. Hyperplasia, squamous cell
3. Acanthosis
4. **Hyperplasia, basal cell**
5. Papilloma ("sessile" or "inverted")

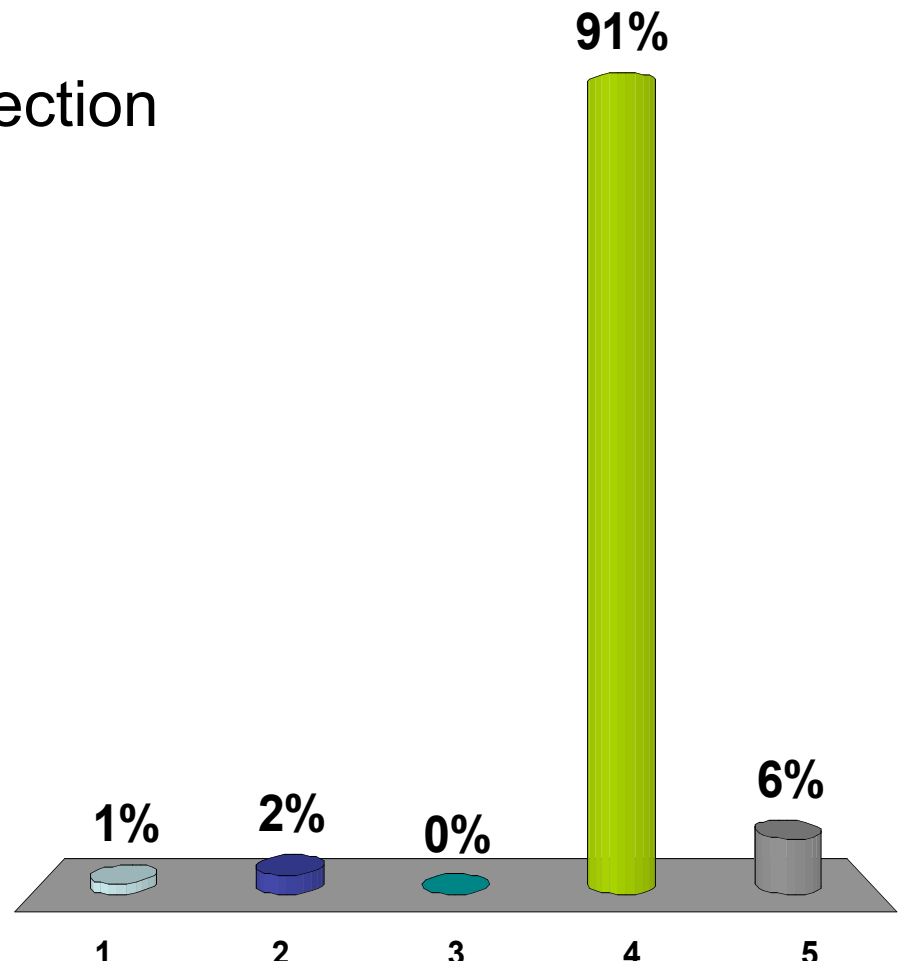

# Nolte Case 3

## What's Your Diagnosis?

1. No abnormality, part of non-glandular mucosa (rete pegs)
2. Ectopic squamous epithelium
3. Hyperplasia, basal cell
4. Metaplasia, basal cell
5. Tumor, basal cell, benign
6. **3 or 4**

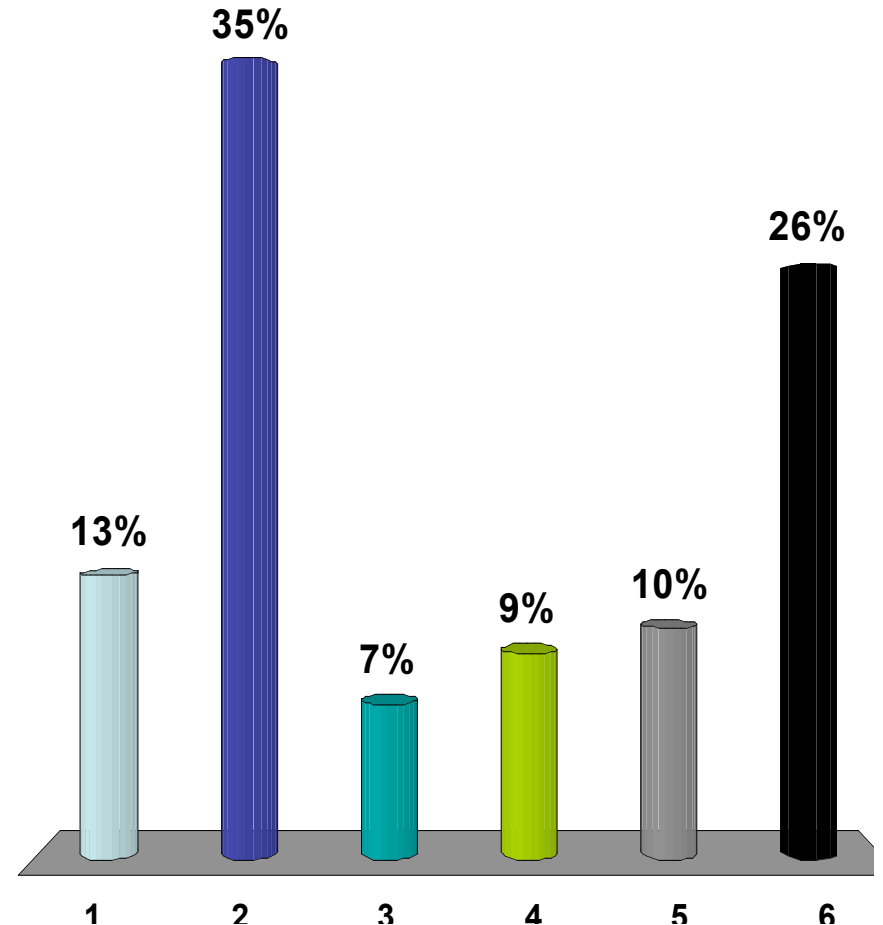

# Rittinghausen Case 1

## What's Your Diagnosis?

1. Bronchiolo-alveolar carcinoma
2. Bronchial adenocarcinoma
3. Bronchiolo-alveolar hyperplasia
4. Exaggerated mucous cell metaplasia
5. Hypermucinosi
6. Alveolar lipoproteinosis

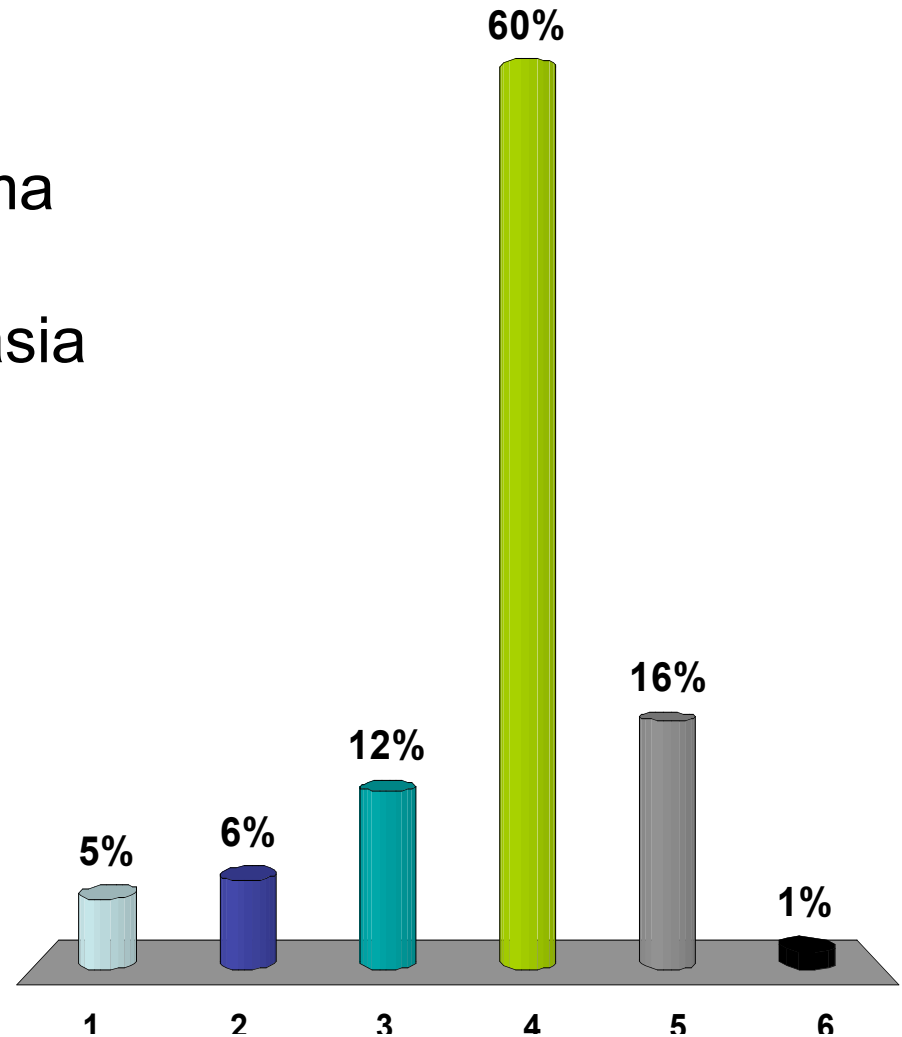

# Bach/Rinke Case 1

## What's Your Diagnosis?

1. Granular cell aggregate
2. Granular cell hyperplasia
3. Benign granular cell tumor
4. Malignant granular cell tumor

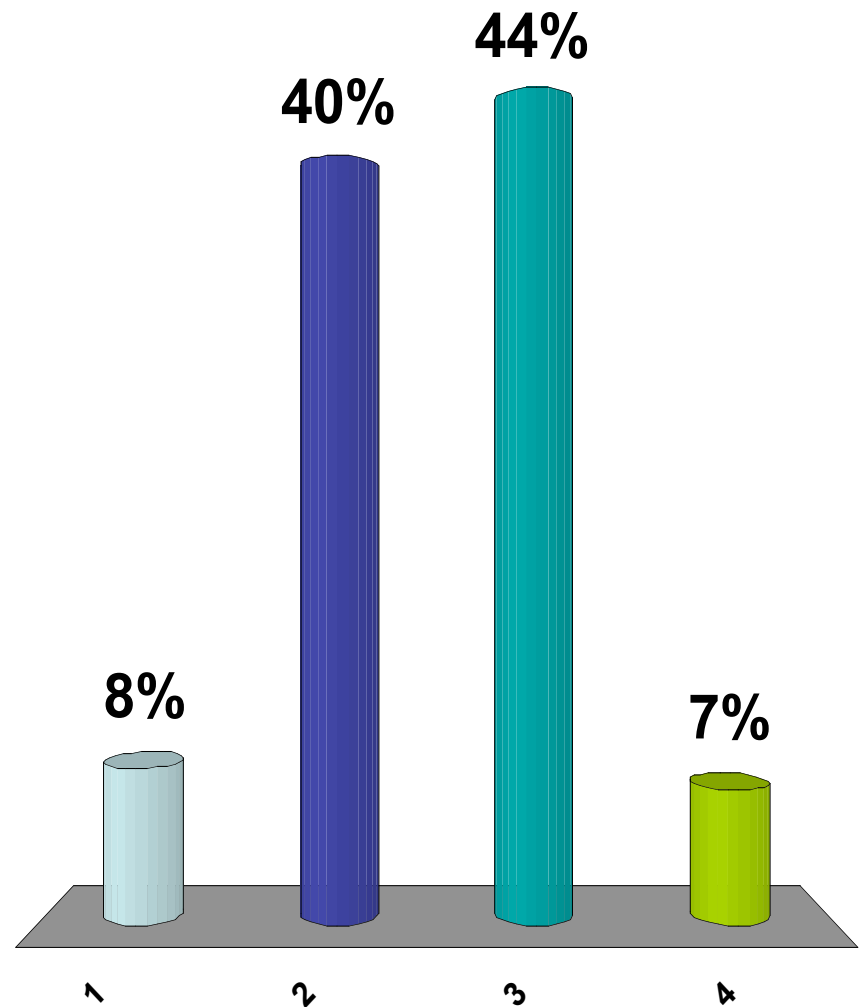

# Maronpot Case 1

## What's Your Diagnosis?

1. Focus of cellular alteration
2. Regenerative hyperplasia
3. Non-regenerative hyperplasia (focal hyperplasia)
4. Hepatocellular adenoma
5. Hepatocellular carcinoma

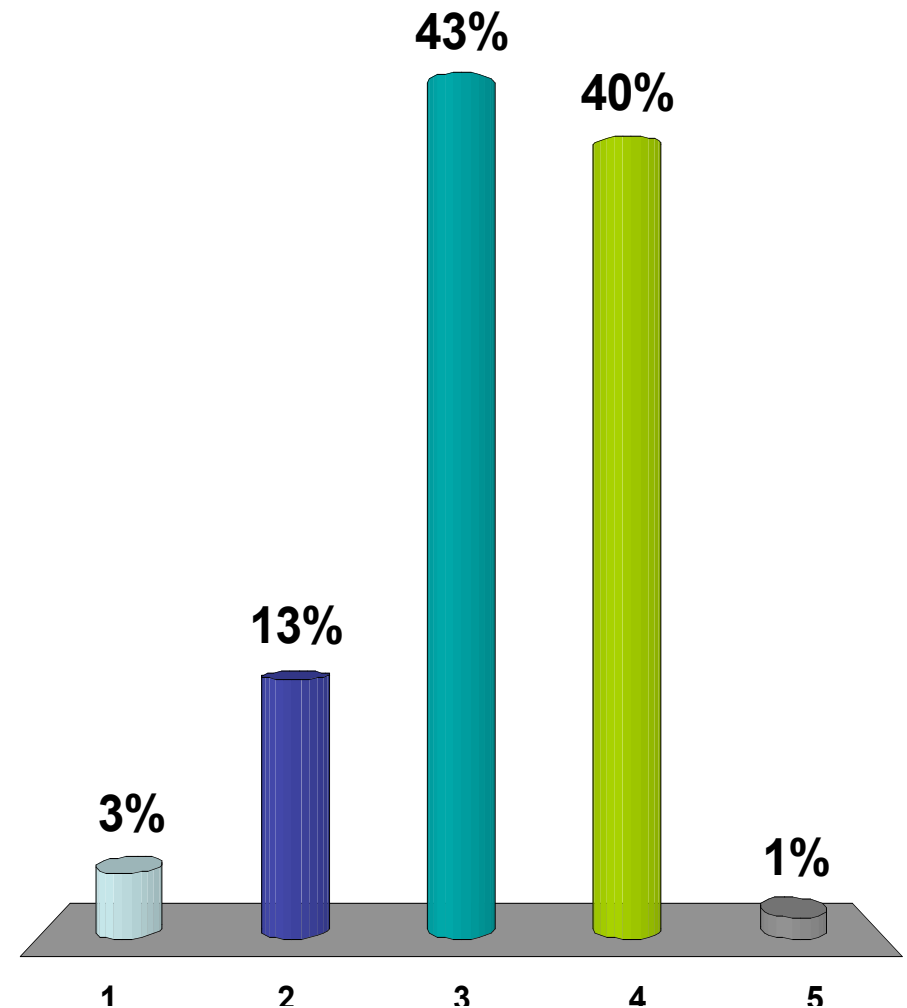

# Maronpot Case 1

## NTP PWG Votes

1. Focus of cellular alteration (2)
2. Regenerative hyperplasia
3. Non-regenerative hyperplasia (focal hyperplasia)
4. Hepatocellular adenoma (4)
5. Hepatocellular carcinoma
6. Nodular hyperplasia (3)



# Maronpot Case 2

## What's Your Diagnosis?

1. Focus of cellular alteration
2. Regenerative hyperplasia
3. Non-regenerative hyperplasia (focal hyperplasia)
4. Hepatocellular adenoma
5. Hepatocellular carcinoma

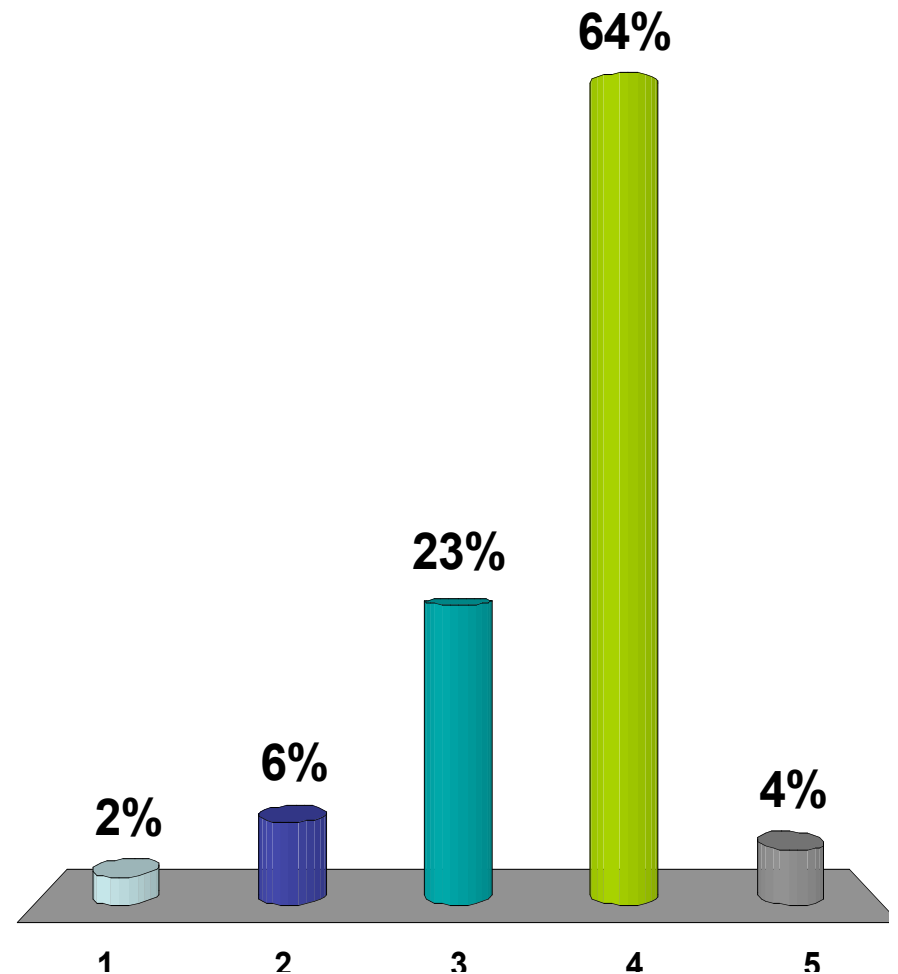

# Maronpot Case 2

## NTP PWG Votes

1. Focus of cellular alteration **(6)**
2. Regenerative hyperplasia
3. Non-regenerative hyperplasia  
(focal hyperplasia)
4. Hepatocellular adenoma **(3)**
5. Hepatocellular carcinoma

# Maronpot Case 3

## What's Your Diagnosis?

1. Focus of cellular alteration
2. Regenerative hyperplasia
3. Non-regenerative hyperplasia (focal hyperplasia)
4. Hepatocellular adenoma
5. Hepatocellular carcinoma

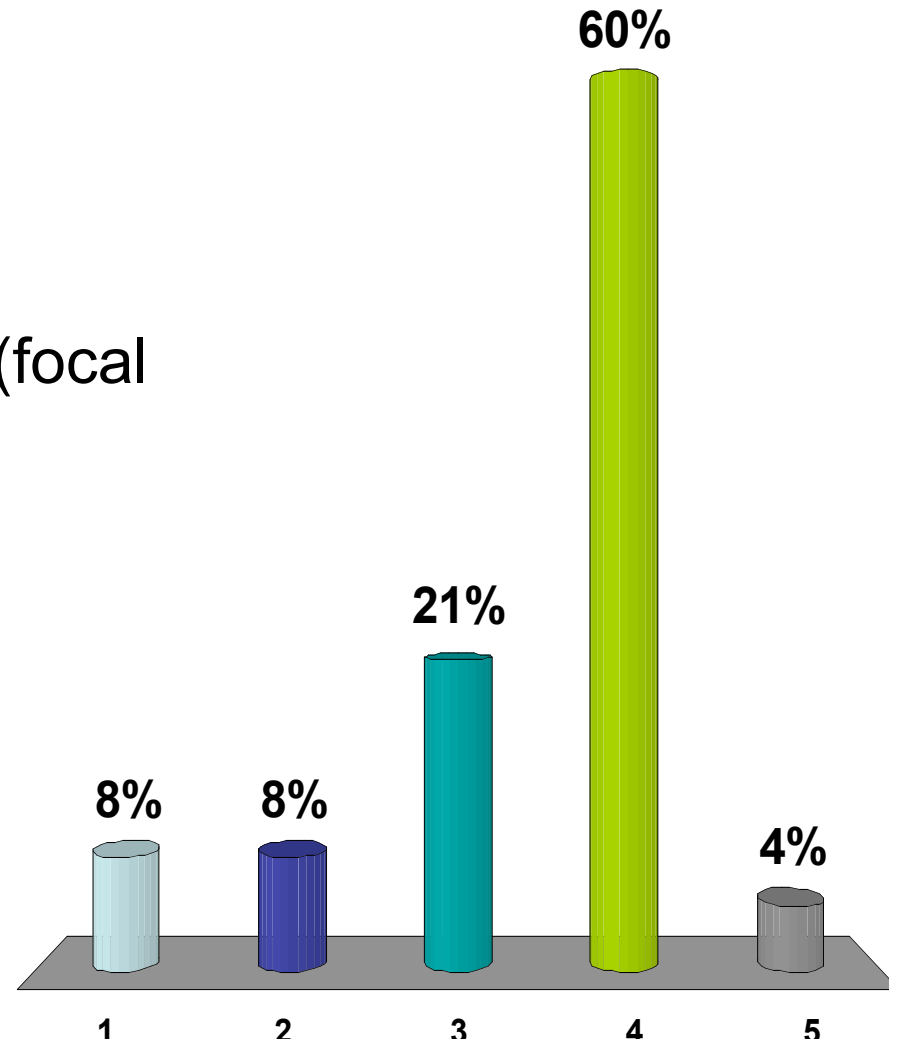

# Maronpot Case 3

## NTP PWG Votes

1. Focus of cellular alteration (3)
2. Regenerative hyperplasia
3. Non-regenerative hyperplasia (focal hyperplasia)
4. Hepatocellular adenoma (3)
5. Hepatocellular carcinoma
6. Nodular hyperplasia (3)
